# Supplementary material for: RAFT aqueous emulsion polymerization of methyl methacrylate: observation of unexpected constraints when employing a non-ionic steric stabilizer block
Source: Royal Society of Chemistry journal article supplement (doi:10.1039/d1py01008e), 2021-01-01
Supplement: d1py01008e1.pdf [file d1py01008e1.pdf]

## Supporting Information for:

### *RAFT Aqueous Emulsion Polymerization of Methyl Methacrylate: Observation of Unexpected Constraints When Employing a Non-ionic Steric Stabilizer Block*

D. H. H. Chan, A. A Cockram, R. R. Gibson, E. L. Kynaston, C. Lindsay, P. Taylor and S. P. Armes\*

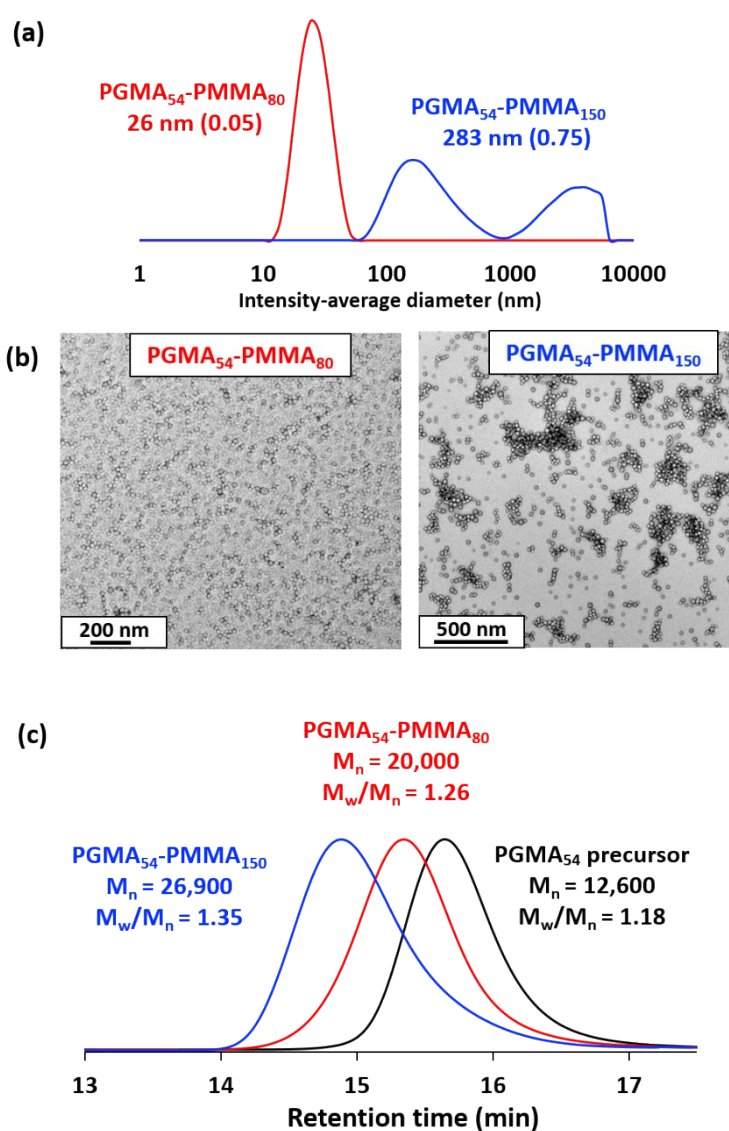

**Figure S1.** (a) DLS intensity-average size distributions and (b) corresponding TEM images obtained for HOOC-PGMA<sub>54</sub>-PMMA<sub>80</sub> and HOOC-PGMA<sub>54</sub>-PMMA<sub>150</sub> nanoparticles and (c) DMF GPC curves recorded for the HOOC-PGMA<sub>54</sub> precursor, HOOC-PGMA<sub>54</sub>-PMMA<sub>80</sub> and HOOC-PGMA<sub>54</sub>-PMMA<sub>150</sub> nanoparticles.

## Synthesis Protocols

### *Synthesis of a PMETAC<sub>46</sub> precursor by RAFT Aqueous Solution Polymerization of METAC*

METAC monomer (5.0 g, 19.3 mmol; supplied as an 80% w/w aqueous solution), PETTC RAFT agent (0.131 g, 0.385 mmol, target DP = 50) and ACVA initiator (21.6 mg, 0.08 mmol; PETTC/ACVA molar ratio = 5.0) were weighed into a 50 mL round-bottom flask. After addition of ethanol (7.79 g, 60 % w/w), the solution was degassed with N<sub>2</sub> gas for 30 min in an ice bath, before immersing the sealed flask in an oil bath at 70 °C. After 3 h, the polymerization was quenched by exposing the reaction mixture to air while cooling the flask to 20 °C. The crude polymer was isolated by slowly pouring the reaction mixture into a ten-fold excess of acetonitrile. The precipitated polymer was dissolved in water prior to a second precipitation using excess acetonitrile. The purified polymer was then freeze-dried overnight. End-group analysis via <sup>1</sup>H NMR spectroscopy indicated a mean DP of 46 for this PMETAC precursor.

### *Synthesis of PMETAC<sub>46</sub>-PMMA<sub>x</sub> Diblock Copolymer Nanoparticles by RAFT Aqueous Emulsion*

#### *Polymerization of MMA*

A typical protocol for the synthesis of PMETAC<sub>46</sub>-PMMA<sub>x</sub> diblock copolymer nanoparticles was conducted as follows. The dithiobenzoate-capped PMETAC<sub>46</sub> precursor (0.150 g, 15.2 μmol), MMA monomer (0.152 g, 1.52 mmol, target DP = 100), ACVA initiator (0.800 mg, 3.03 μmol, PMETAC<sub>46</sub>/ACVA molar ratio = 5.0) and deionized water (1.211 g, 20 % w/w solution) were added in turn to a 20 mL round-bottom flask. This flask was then placed in an ice bath and the reaction mixture was degassed with N<sub>2</sub> gas for 30 min, before immersing in an oil bath set at 70 °C. After 6 h, the polymerization was quenched by exposing the reaction mixture to air while cooling the flask to 20 °C. An MMA conversion of 99% was determined by <sup>1</sup>H NMR spectroscopy studies. Other DPs were targeted by adjusting the relative amounts of MMA and PMETAC<sub>46</sub> precursor as required.

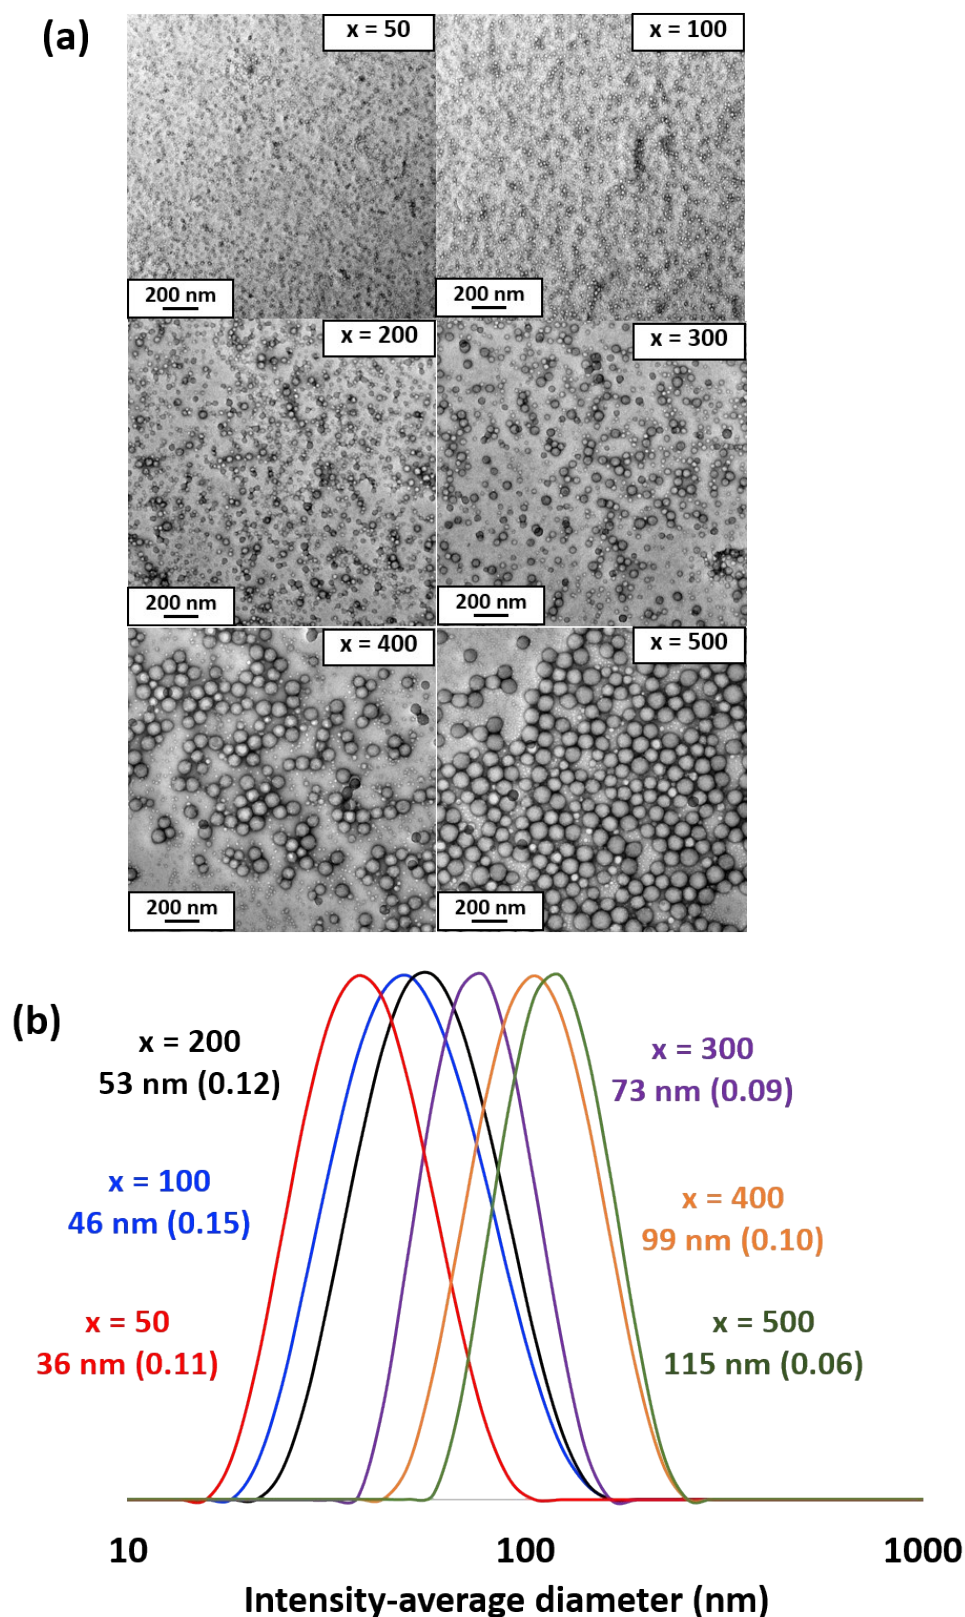

**Figure S2.** (a) Representative TEM images and (b) DLS intensity-average size distributions obtained for a series of six aqueous dispersions of PMETAC<sub>46</sub>-PMMA<sub>x</sub> nanoparticles prepared by RAFT aqueous emulsion polymerization of MMA where the target PMMA DP (x) is 50, 100, 200, 300, 400 or 500.

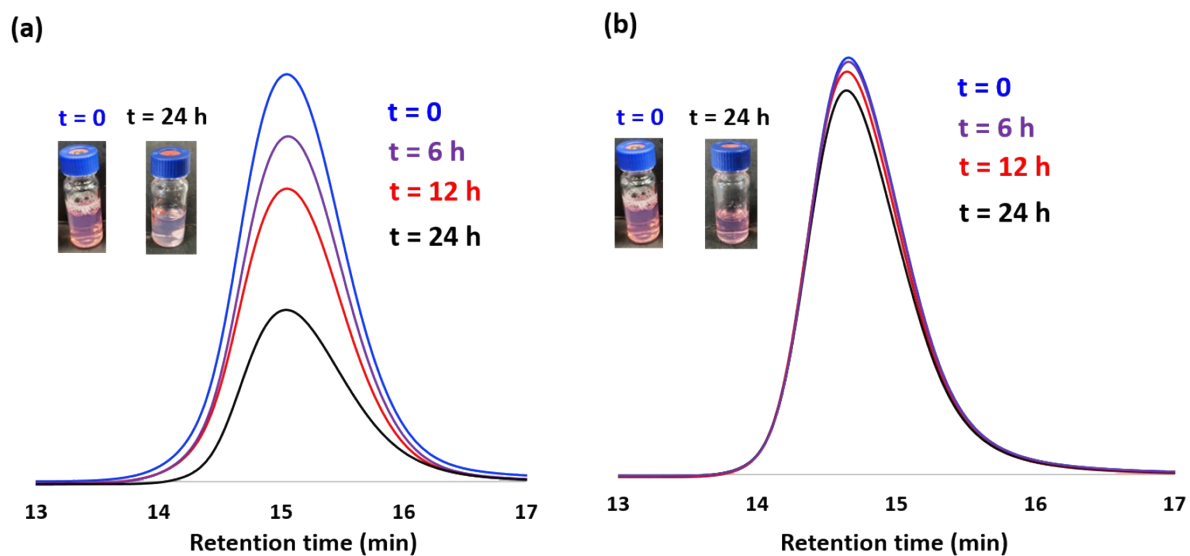

**Figure S3.** UV GPC curves ( $\lambda = 309$  nm) recorded during kinetic studies of the removal of **dithiobenzoate** end-groups from an aqueous dispersion of PGMA<sub>50</sub>-PMMA<sub>80</sub> spherical nanoparticles at 80 °C using (a) H<sub>2</sub>O<sub>2</sub> (using a H<sub>2</sub>O<sub>2</sub>/dithiobenzoate molar ratio of 5.0) and (b) in the absence of either visible light irradiation or H<sub>2</sub>O<sub>2</sub> (control).

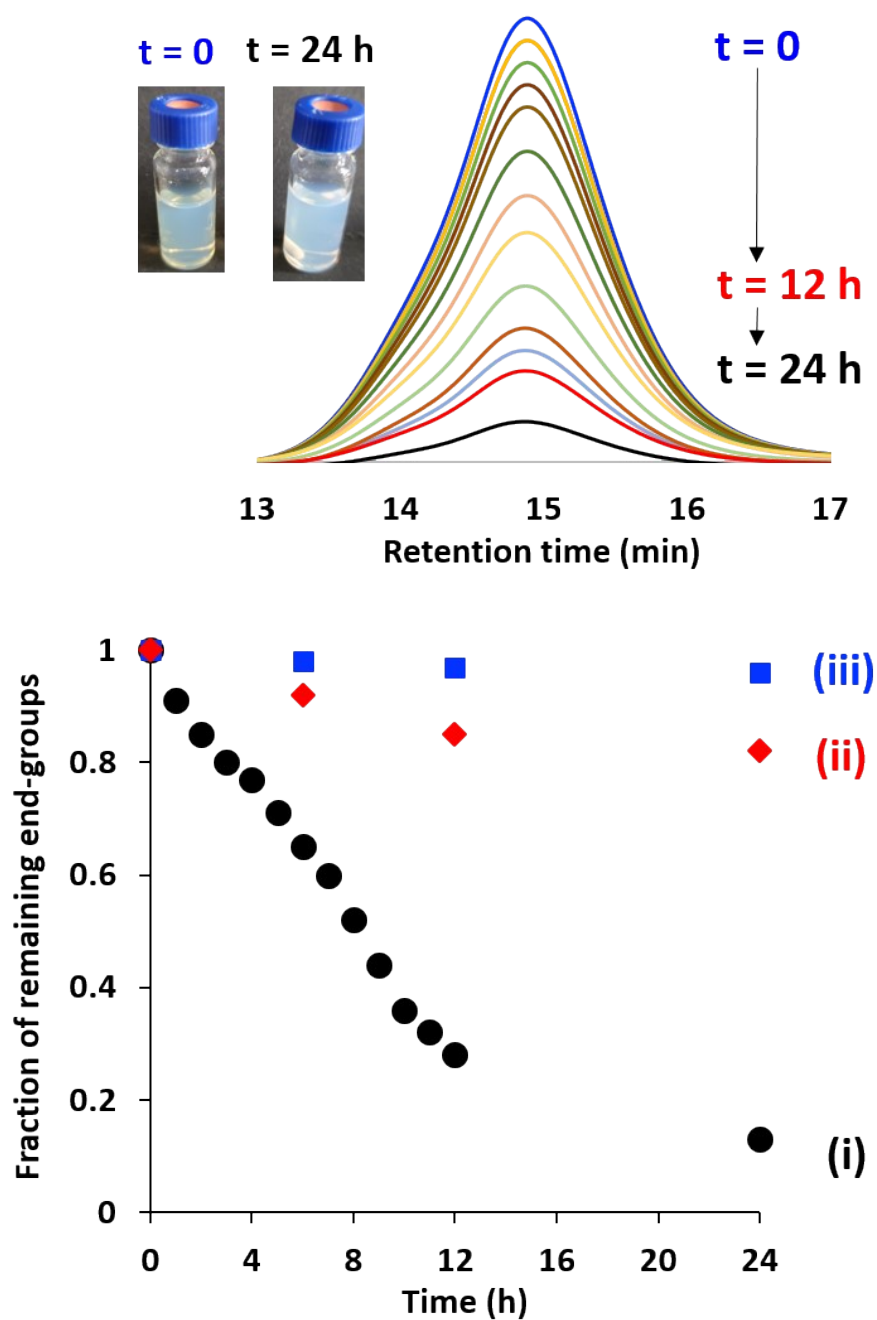

**Figure S4.** (a) UV GPC curves ( $\lambda = 309$  nm) recorded during kinetic studies of the removal of **trithiocarbonate** end-groups from a 10% w/w aqueous dispersion of HOOC-PGMA<sub>54</sub>-PMMA<sub>80</sub> spherical nanoparticles at 80 °C. (b) Fraction of remaining **trithiocarbonate** RAFT end-groups over time determined by UV GPC when a 10% w/w aqueous dispersion of HOOC-PGMA<sub>54</sub>-PMMA<sub>80</sub> spherical nanoparticles at 80 °C is exposed to: (i) continuous visible light irradiation ( $\lambda = 405$  nm), (ii)  $H_2O_2$  ( $H_2O_2$ /trithiocarbonate molar ratio = 5.0) and (iii) no visible light irradiation or  $H_2O_2$  (control).

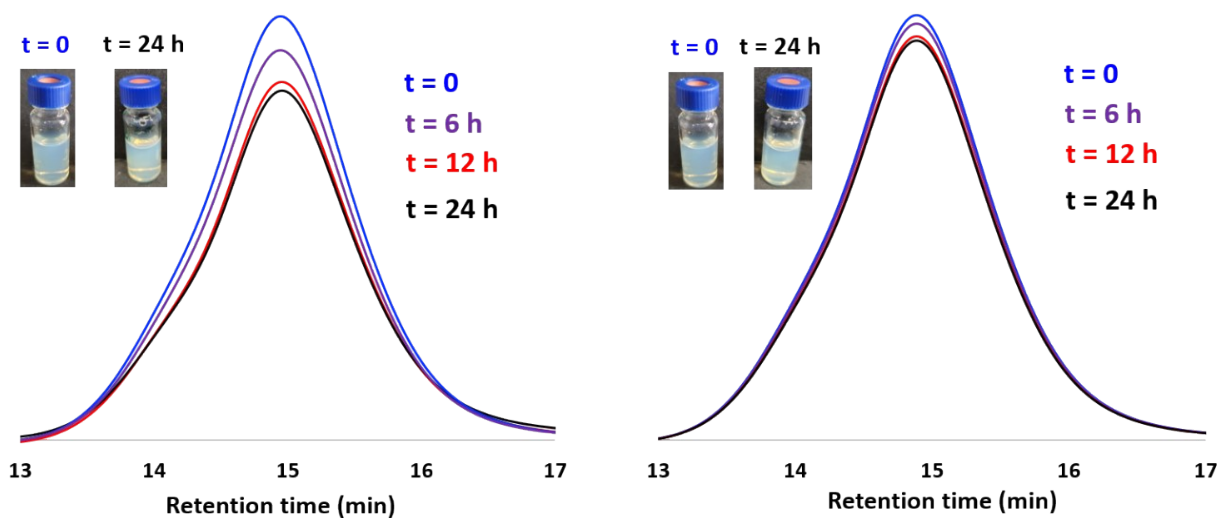

**Figure S5.** UV GPC curves ( $\lambda = 309$  nm) recorded during kinetic studies of the attempted removal of **trithiocarbonate** end-groups from an aqueous dispersion of HOOC-PGMA<sub>54</sub>-PMMA<sub>80</sub> spheres at 80 °C using (a) H<sub>2</sub>O<sub>2</sub> (H<sub>2</sub>O<sub>2</sub>/trithiocarbonate molar ratio = 5.0) and (b) in the absence of either visible light irradiation or H<sub>2</sub>O<sub>2</sub> (control).
